# Supplementary material for: Staphylococcus aureus Infection-Related Glomerulonephritis with Dominant IgA Deposition
Source: MDPI journal article supplement (doi:10.3390/ijms23137482), 2022-07-05
Supplement: s1 [file s1]

**Table S1.** Case reports of IgA-IRGN or SAGN.

| Ref. No. | Authors                     | Year | category |      | age | gender | underlying diseases |        | Causative bacteria      | Infection sites        |
|----------|-----------------------------|------|----------|------|-----|--------|---------------------|--------|-------------------------|------------------------|
|          |                             |      | IgA-IRGN | SAGN |     |        | diabetes            | cancer |                         |                        |
| 14       | Garcia RA, et al.           | 2021 | Yes      | Yes  | 70  | M      | no                  | no     | S. aureus               | LVAD                   |
| 15       | Nogueira RF, et al.         | 2021 | Yes      | Yes  | 66  | M      | no                  | no     | S. aureus               | vascular graft         |
| 16       | Sahoo RR, et al.            | 2021 | Yes      | Yes  | 40  | M      | no                  | no     | S. aureus               | cellulitis             |
| 17       | Pérez A, et al.             | 2021 | Yes      | No   | 88  | M      | no                  | no     | SARS-CoV2               | pneumonia              |
| 18       | Han W, et al.               | 2021 | Yes      | No   | 82  | M      | no                  | no     | unknown                 | unknown                |
| 19       | Hellwege RS, et al.         | 2020 | NA       | Yes  | 23  | M      | no                  | no     | S. aureus               | IE                     |
| 20       | Brunet A, et al.            | 2020 | NA       | Yes  | 27  | M      | no                  | no     | S. aureus               | IE                     |
|          |                             | 2020 | Yes      | Yes  | 74  | M      | no                  | no     | S. aureus               | spondylodiscitis & IE  |
| 21       | Zhang Y, et al.             | 2020 | Yes      | Yes  | 47  | M      | yes                 | no     | S. aureus               | pneumonia              |
| 22       | Nguyen N, et al.            | 2020 | Yes      | Yes  | 57  | M      | yes                 | no     | S. aureus               | AV graft               |
| 23       | Indhumathi E, et al.        | 2020 | Yes      | Yes  | 60  | M      | no                  | no     | S. aureus & M. leprae   | skin                   |
| 24       | Shirai Y, et al.            | 2020 | Yes      | No   | 5   | M      | no                  | no     | parvovirus19            | unknown                |
| 25       | Klimko A, et al.            | 2020 | Yes      | Yes  | 43  | M      | no                  | no     | Staphylococcus          | skin                   |
| 26       | Völker LA, et al.           | 2019 | No       | Yes  | 43  | F      | no                  | no     | S. epidermidis          | VA shunt               |
| 27       | Carbayo J, et al.           | 2019 | Yes      | Yes  | 70  | M      | no                  | no     | S. aureus               | osteomyelitis          |
| 28       | AlQahtani H, et al.         | 2019 | Yes      | Yes  | 81  | M      | no                  | yes    | S. aureus               | osteomyelitis          |
| 29       | Parente YDM, et al.         | 2019 | Yes      | No   | 55  | F      | no                  | no     | bacilli agglomerates    | unknown                |
| 30       | Molina-Andújar A, et al.    | 2019 | No       | Yes  | 69  | M      | no                  | no     | S. aureus               | unknown                |
|          |                             | 2019 | Yes      | No   | 65  | M      | no                  | no     | H. zoster / Influenza A | unknown                |
| 31       | Orozco Guillén AO, et al.   | 2019 | Yes      | No   | 16  | F      | no                  | no     | syphilis (Treponema)    | unknown                |
| 32       | Cascais de Sá D, et al.     | 2018 | Yes      | Yes  | 56  | M      | no                  | no     | S. aureus               | pyelonephritis         |
| 33       | Shimamura Y, et al.         | 2018 | Yes      | Yes  | 80  | M      | yes                 | no     | S. aureus               | lung abscess           |
| 34       | Basic-Jukic N, et al.       | 2018 | Yes      | Yes  | 65  | M      | yes                 | no     | E. coli                 | urinary tract          |
| 35       | Mahmood T, et al.           | 2018 | Yes      | Yes  | 64  | M      | yes                 | no     | S. aureus               | epidural abscess       |
| 36       | Liang JH, et al.            | 2016 | Yes      | Yes  | 22  | F      | no                  | no     | S. aureus               | skin                   |
| 37       | Okada M, et al.             | 2016 | No       | Yes  | 12  | M      | no                  | no     | S. epidermidis          | CV devise              |
|          |                             | 2016 | No       | Yes  | 24  | F      | no                  | no     | S. epidermidis          | CV devise              |
| 38       | Srinivasaraghavan R, et al. | 2016 | Yes      | No   | 12  | F      | no                  | no     | unknown                 | unknown                |
| 39       | Nayer A, et al.             | 2016 | Yes      | Yes  | 82  | M      | yes                 | no     | S. aureus               | osteomyelitis          |
| 40       | Caetano J, et al.           | 2015 | Yes      | Yes  | 56  | M      | yes                 | no     | S. aureus               | epidural abscess       |
| 41       | Hayashi S, et al.           | 2015 | No       | Yes  | 45  | M      | no                  | no     | Staphylococcus          | CV devise              |
| 42       | Rus RR, et al.              | 2015 | Yes      | No   | 3   | M      | no                  | no     | Streptococcus           | rhumtoid fever         |
| 43       | Saad M, et al.              | 2015 | Yes      | Yes  | 86  | M      | no                  | no     | S. aureus               | pneumonia              |
| 44       | Kikuchi H, et al.           | 2014 | Yes      | No   | 76  | M      | yes                 | yes    | E. coli                 | cholangitis            |
| 45       | Mandai S, et al.            | 2013 | Yes      | Yes  | 37  | M      | no                  | no     | S. aureus               | Otitis & skin          |
| 46       | Erqou S, et al.             | 2012 | Yes      | Yes  | 61  | M      | yes                 | yes    | S. aureus               | knee joint             |
| 47       | Kimata T, et al.            | 2012 | Yes      | Yes  | 6   | F      | no                  | no     | S. aureus               | pneumonia              |
| 48       | Chen YR, et al.             | 2011 | Yes      | Yes  | 57  | M      | no                  | no     | S. aureus               | hip joint              |
| 49       | Wehbe E, et al.             | 2011 | Yes      | Yes  | 73  | M      | yes                 | yes    | S. aureus               | pleuritis              |
|          |                             | 2011 | Yes      | Yes  | 69  | F      | no                  | no     | S. aureus               | PM lead infection      |
| 50       | Kapadia AS, et al.          | 2011 | Yes      | Yes  | 39  | M      | no                  | no     | S. aureus               | psaos abscess          |
| 51       | Upadhaya BK, et al.         | 2010 | Yes      | No   | 15  | M      | no                  | no     | dengue virus            | unknown                |
| 52       | Riley AM, et al.            | 2009 | Yes      | Yes  | 64  | M      | yes                 | no     | S. aureus               | osteomyelitis          |
| 53       | Okuyama S, et al.           | 2008 | Yes      | Yes  | 48  | M      | no                  | no     | S. aureus               | mediastinal abcess     |
| 54       | Kusaba T, et al.            | 2008 | No       | Yes  | 59  | F      | no                  | yes    | S. epidermidis          | CV devise              |
| 55       | Ho CI, et al.               | 2008 | No       | Yes  | 70  | F      | yes                 | no     | S. aureus               | osteomyelitis          |
| 56       | Kimmel M, et al.            | 2008 | NA       | No   | 36  | F      | no                  | no     | propionibacterium       | PM lead infection      |
| 57       | Hashimoto M, et al.         | 2007 | Yes      | Yes  | 28  | F      | no                  | no     | S. aureus               | genital infection      |
| 58       | Hoshino C, et al.           | 2007 | NA       | Yes  | 59  | F      | no                  | no     | S. aureus               | pneumonia + abscess    |
| 59       | Long JA, et al.             | 2006 | Yes      | Yes  | 66  | M      | no                  | no     | S. aureus               | sternoclavicular joint |
| 60       | Kitamura T, et al.          | 2006 | Yes      | Yes  | 66  | M      | no                  | yes    | S. aureus               | abdominal abscess      |
| 61       | Ohara S, et al.             | 2006 | No       | Yes  | 13  | M      | no                  | no     | S. epidermidis          | CV devise              |
| 62       | Iyoda M, et al.             | 2006 | Yes      | No   | 88  | F      | no                  | no     | Chlamydia pneumoniae    | pneumonia              |
| 63       | Manzoor K, et al.           | 2005 | No       | Yes  | 40  | F      | no                  | no     | S. aureus               | IE                     |
| 64       | Cheema SR, et al.           | 2004 | Yes      | No   | 61  | M      | no                  | no     | hepatitis A             | liver                  |
| 65       | Handa T, et al.             | 2003 | Yes      | Yes  | 57  | F      | no                  | no     | S. aureus               | pharygeal, stool, skin |
| 66       | Arrizabalaga P, et al.      | 2003 | Yes      | Yes  | 72  | M      | no                  | yes    | Staphylococcus          | CV devise              |
| 67       | Pola E, et al.              | 2003 | Yes      | Yes  | 30  | M      | no                  | no     | S. aureus               | knee joint             |
| 68       | Peel R, et al.              | 2003 | No       | Yes  | 60  | M      | no                  | no     | S. aureus               | lumber disk            |
| 69       | Kubota M, et al.            | 2001 | No       | Yes  | 52  | M      | no                  | no     | S. epidermidis          | VA shunt               |
| 70       | Balogun RA, et al.          | 2001 | No       | No   | 74  | M      | no                  | no     | propionibacterium       | VA shunt & pneumonia   |
| 71       | Yamashita Y, et al.         | 2001 | No       | Yes  | 58  | M      | no                  | yes    | S. aureus               | pneumonia              |
| 72       | Barnadas MA, et al.         | 1998 | Yes      | Yes  | 82  | M      | no                  | no     | S. aureus               | skin                   |
| 73       | Griffin MD, et al.          | 1997 | Yes      | Yes  | 72  | M      | no                  | no     | S. aureus               | wound                  |
| 74       | Kitazawa M, et al.          | 1997 | No       | No   | 68  | M      | yes                 | no     | S. aureus               | pneumonia              |
| 75       | Pulik M, et al.             | 1995 | No       | Yes  | 71  | F      | no                  | yes    | S. aureus               | CV device              |

IgA-IRGN, IgA-dominant deposition infection-related glomerulonephritis; SAGN, Staphylococcus infection-associated glomerulonephritis; M, male; F, female; LVAD, ; IE, infective endocrditis; AV, arteriovenous; VA, ventriculoatrial; CV, central venous; PM, pacemaker

| Ref. No. | symptomes   |                    |             |           |         | Laboratory data     |                          |                  |                 |                 |                        |
|----------|-------------|--------------------|-------------|-----------|---------|---------------------|--------------------------|------------------|-----------------|-----------------|------------------------|
|          | AKI or RPGN | nephrotic syndrome | proteinuria | hematuria | purpura | proteinuria (g/gCr) | serum creatinine (mg/dL) | serum IgA levels | serum C3 levels | serum C4 levels | positive test for ANCA |
| 14       | present     | NA                 | NA          | present   | present | NA                  | 6.98                     | NA               | NA              | NA              | NA                     |
| 15       | present     | abscent            | present     | present   | abscent | 0.6                 | 5.26                     | NA               | normal          | normal          | postitive              |
| 16       | abscent     | abscent            | present     | present   | abscent | 1.4                 | 2.20                     | NA               | decreased       | decreased       | NA                     |
| 17       | present     | present            | present     | present   | abscent | 3.8                 | 2.28                     | NA               | normal          | decreased       | negative               |
| 18       | present     | present            | present     | present   | abscent | 4.5                 | 3.12                     | high             | normal          | normal          | negative               |
| 19       | present     | abscent            | present     | NA        | abscent | 10.0                | 1.60                     | NA               | decreased       | normal          | negative               |
| 20       | abscent     | abscent            | abscent     | abscent   | present | NA                  | NA                       | NA               | normal          | decreased       | negative               |
|          | present     | present            | present     | present   | abscent | 2.4                 | 2.44                     | NA               | normal          | normal          | negative               |
| 21       | present     | abscent            | present     | present   | abscent | NA                  | 1.76                     | normal           | normal          | normal          | negative               |
| 22       | present     | present            | present     | present   | abscent | 7.2                 | 5.20                     | NA               | decreased       | NA              | NA                     |
| 23       | present     | NA                 | present     | present   | present | NA                  | 4.10                     | NA               | decreased       | normal          | negative               |
| 24       | present     | abscent            | present     | present   | abscent | 9.1                 | 1.94                     | NA               | NA              | NA              | negative               |
| 25       | present     | present            | present     | present   | abscent | 3.7                 | 3.22                     | NA               | NA              | NA              | negative               |
| 26       | abscent     | abscent            | present     | present   | abscent | 0.0                 | 2.07                     | NA               | decreased       | NA              | NA                     |
| 27       | present     | present            | present     | present   | abscent | 5.4                 | 3.54                     | NA               | NA              | NA              | NA                     |
| 28       | present     | NA                 | present     | present   | present | 0.9                 | 2.94                     | high             | normal          | NA              | NA                     |
| 29       | present     | NA                 | present     | present   | NA      | NA                  | 21.94                    | NA               | decreased       | normal          | negative               |
| 30       | present     | NA                 | present     | present   | NA      | NA                  | NA                       | NA               | decreased       | NA              | negative               |
|          | present     | NA                 | present     | present   | NA      | NA                  | NA                       | NA               | decreased       | NA              | negative               |
| 31       | abscent     | present            | present     | present   | abscent | 6.4                 | 0.80                     | NA               | normal          | decreased       | negative               |
| 32       | present     | present            | present     | present   | abscent | 4.6                 | 3.96                     | NA               | decreased       | NA              | NA                     |
| 33       | present     | present            | present     | present   | present | 5.2                 | 5.30                     | high             | decreased       | decreased       | negative               |
| 34       | abscent     | present            | present     | present   | NA      | 16.0                | 2.15                     | normal           | decreased       | NA              | negative               |
| 35       | present     | present            | present     | present   | present | 3.2                 | 5.58                     | NA               | decreased       | normal          | negative               |
| 36       | present     | present            | present     | present   | abscent | 4.2                 | 6.80                     | normal           | decreased       | decreased       | negative               |
| 37       | abscent     | abscent            | present     | present   | abscent | 0.1                 | 0.68                     | NA               | decreased       | decreased       | postitive              |
|          | abscent     | abscent            | present     | present   | abscent | 0.2                 | 0.92                     | NA               | decreased       | decreased       | postitive              |
| 38       | present     | NA                 | present     | present   | abscent | NA                  | 5.20                     | NA               | decreased       | decreased       | negative               |
| 39       | present     | NA                 | NA          | NA        | present | NA                  | 5.90                     | NA               | NA              | NA              | negative               |
| 40       | present     | present            | present     | present   | abscent | 6.6                 | 4.70                     | NA               | decreased       | NA              | negative               |
| 41       | present     | abscent            | present     | present   | abscent | 1.5                 | 1.23                     | normal           | decreased       | decreased       | negative               |
| 42       | present     | present            | present     | present   | abscent | 2.2                 | 2.71                     | NA               | decreased       | normal          | negative               |
| 43       | present     | present            | present     | present   | NA      | NA                  | 9.20                     | NA               | normal          | normal          | negative               |
| 44       | present     | abscent            | present     | present   | present | 2.0                 | 2.79                     | high             | normal          | normal          | negative               |
| 45       | present     | present            | present     | present   | present | 11.6                | 1.13                     | normal           | normal          | normal          | negative               |
| 46       | present     | NA                 | present     | present   | abscent | NA                  | 5.30                     | NA               | normal          | normal          | negative               |
| 47       | abscent     | present            | present     | abscent   | abscent | 9.6                 | 0.38                     | normal           | normal          | normal          | NA                     |
| 48       | present     | abscent            | present     | present   | abscent | 2.9                 | 2.80                     | high             | decreased       | normal          | negative               |
| 49       | present     | present            | present     | present   | abscent | 13.0                | 3.60                     | NA               | normal          | normal          | negative               |
|          | present     | present            | present     | present   | NA      | 3.6                 | 3.23                     | NA               | normal          | normal          | negative               |
| 50       | present     | abscent            | present     | present   | NA      | 2.9                 | 7.40                     | NA               | NA              | NA              | NA                     |
| 51       | present     | abscent            | present     | present   | abscent | NA                  | 8.40                     | high             | normal          | NA              | negative               |
| 52       | present     | abscent            | present     | present   | abscent | NA                  | 6.10                     | NA               | normal          | normal          | negative               |
| 53       | present     | present            | present     | present   | present | 15.0                | 1.56                     | normal           | normal          | normal          | negative               |
| 54       | present     | present            | present     | present   | abscent | 11.1                | 7.05                     | normal           | decreased       | decreased       | negative               |
| 55       | present     | abscent            | present     | present   | abscent | 1.2                 | 4.50                     | NA               | decreased       | normal          | negative               |
| 56       | abscent     | abscent            | present     | present   | NA      | 5.9                 | 0.90                     | NA               | decreased       | normal          | negative               |
| 57       | present     | present            | present     | present   | present | 11.0                | 1.50                     | normal           | normal          | normal          | NA                     |
| 58       | present     | present            | present     | present   | abscent | 4.6                 | 2.23                     | NA               | decreased       | decreased       | negative               |
| 59       | present     | abscent            | present     | present   | abscent | 3.1                 | 4.10                     | NA               | decreased       | NA              | NA                     |
| 60       | present     | abscent            | present     | present   | present | NA                  | 1.30                     | high             | decreased       | decreased       | NA                     |
| 61       | abscent     | abscent            | present     | present   | abscent | 0.3                 | 0.60                     | high             | decreased       | decreased       | NA                     |
| 62       | present     | abscent            | present     | present   | NA      | 0.7                 | 5.40                     | high             | normal          | normal          | negative               |
| 63       | present     | abscent            | present     | present   | abscent | NA                  | 6.00                     | NA               | decreased       | decreased       | NA                     |
| 64       | abscent     | present            | present     | present   | present | 6.8                 | 0.90                     | NA               | normal          | normal          | NA                     |
| 65       | present     | present            | present     | present   | abscent | 5.8                 | 1.20                     | high             | normal          | normal          | negative               |
| 66       | present     | present            | present     | present   | present | 10.4                | 4.90                     | normal           | normal          | normal          | negative               |
| 67       | abscent     | abscent            | present     | present   | abscent | 0.6                 | NA                       | NA               | NA              | NA              | NA                     |
| 68       | present     | abscent            | present     | present   | abscent | NA                  | 9.20                     | NA               | normal          | normal          | negative               |
| 69       | NA          | present            | present     | present   | abscent | 8.3                 | NA                       | NA               | decreased       | decreased       | NA                     |
| 70       | present     | present            | present     | present   | abscent | 6.2                 | 3.10                     | NA               | normal          | normal          | negative               |
| 71       | present     | abscent            | present     | present   | abscent | 1.1                 | 5.80                     | high             | normal          | normal          | negative               |
| 72       | present     | NA                 | NA          | NA        | abscent | NA                  | NA                       | NA               | normal          | normal          | negative               |
| 73       | present     | NA                 | NA          | present   | NA      | NA                  | 10.40                    | NA               | normal          | normal          | negative               |
| 74       | present     | abscent            | present     | present   | abscent | 2.5                 | 3.20                     | high             | normal          | normal          | negative               |
| 75       | present     | NA                 | present     | present   | NA      | 1.0                 | 6.18                     | NA               | decreased       | decreased       | NA                     |

NA, not available

| Ref. No. | Light microscopy            | Immunofluorescence microscopy |         |         |         | Electron microscopy |                    |                     |               |         |
|----------|-----------------------------|-------------------------------|---------|---------|---------|---------------------|--------------------|---------------------|---------------|---------|
|          | main histological diagnosis | Presence of crescents         | IgG     | IgA     | C3      | subepithelial EDD   | subendothelial EDD | intramembranous EDD | mesangial EDD | hump    |
| 14       | NA                          | NA                            | NA      | present | NA      | NA                  | NA                 | NA                  | NA            | NA      |
| 15       | endo + mesangial            | present                       | NA      | present | present | NA                  | NA                 | NA                  | NA            | NA      |
| 16       | endo + mesangial            | NA                            | NA      | present | NA      | NA                  | NA                 | NA                  | NA            | NA      |
| 17       | endo                        | NA                            | present | present | present | abscent             | present            | abscent             | present       | abscent |
| 18       | endo                        | present                       | present | present | present | abscent             | present            | abscent             | present       | abscent |
| 19       | NA                          | NA                            | NA      | NA      | NA      | NA                  | NA                 | NA                  | NA            | NA      |
| 20       | NA                          | NA                            | NA      | NA      | NA      | NA                  | NA                 | NA                  | NA            | NA      |
| 21       | endo                        | NA                            | NA      | present | present | NA                  | NA                 | NA                  | present       | NA      |
| 22       | endo                        | abscent                       | abscent | present | present | NA                  | NA                 | NA                  | NA            | NA      |
| 23       | endo                        | abscent                       | NA      | present | present | NA                  | NA                 | NA                  | NA            | NA      |
| 24       | endo                        | present                       | abscent | present | present | abscent             | present            | abscent             | present       | abscent |
| 25       | endo + mesangial            | present                       | NA      | present | present | present             | present            | abscent             | present       | present |
| 26       | MPGN                        | abscent                       | abscent | abscent | abscent | abscent             | present            | abscent             | abscent       | abscent |
| 27       | mesangial                   | present                       | abscent | present | present | present             | abscent            | abscent             | present       | present |
| 28       | NA                          | NA                            | NA      | NA      | NA      | NA                  | NA                 | NA                  | NA            | NA      |
| 29       | mesangial                   | present                       | NA      | present | present | NA                  | NA                 | NA                  | NA            | NA      |
| 30       | endo                        | present                       | present | NA      | present | NA                  | NA                 | NA                  | NA            | NA      |
| 31       | endo + mesangial            | NA                            | abscent | present | present | NA                  | present            | NA                  | NA            | NA      |
| 32       | endo + mesangial            | NA                            | NA      | present | present | NA                  | NA                 | NA                  | NA            | NA      |
| 33       | endo                        | NA                            | NA      | present | present | NA                  | NA                 | NA                  | NA            | NA      |
| 34       | mesangial                   | present                       | abscent | present | present | present             | NA                 | NA                  | NA            | present |
| 35       | endo + mesangial            | abscent                       | NA      | present | present | present             | NA                 | NA                  | NA            | present |
| 36       | mesangial                   | present                       | NA      | present | present | abscent             | NA                 | NA                  | present       | abscent |
| 37       | MPGN                        | present                       | NA      | NA      | present | NA                  | NA                 | NA                  | present       | NA      |
| 38       | MPGN                        | NA                            | NA      | NA      | present | present             | present            | present             | NA            | NA      |
| 39       | endo                        | present                       | present | present | present | NA                  | NA                 | NA                  | NA            | NA      |
| 40       | endo + mesangial            | NA                            | abscent | present | present | present             | present            | NA                  | NA            | present |
| 41       | MPGN                        | NA                            | NA      | NA      | present | NA                  | NA                 | NA                  | NA            | NA      |
| 42       | endo                        | present                       | present | present | present | present             | present            | NA                  | present       | present |
| 43       | endo + mesangial            | present                       | NA      | present | present | present             | NA                 | NA                  | NA            | present |
| 44       | endo                        | present                       | abscent | present | present | present             | NA                 | NA                  | NA            | present |
| 45       | endo + mesangial            | present                       | abscent | present | present | present             | NA                 | NA                  | present       | NA      |
| 46       | endo + mesangial            | NA                            | NA      | present | NA      | present             | NA                 | NA                  | present       | present |
| 47       | NA                          | NA                            | NA      | NA      | NA      | NA                  | NA                 | NA                  | NA            | NA      |
| 48       | mesangial                   | present                       | present | present | present | abscent             | abscent            | abscent             | present       | abscent |
| 49       | endo + mesangial            | present                       | abscent | present | present | abscent             | present            | NA                  | present       | abscent |
| 50       | endo + mesangial            | NA                            | abscent | present | present | abscent             | NA                 | NA                  | present       | abscent |
| 51       | endo + mesangial            | present                       | abscent | present | present | present             | NA                 | NA                  | present       | present |
| 52       | mesangial                   | NA                            | abscent | present | present | NA                  | NA                 | NA                  | NA            | NA      |
| 53       | crescentic                  | present                       | NA      | present | present | abscent             | abscent            | abscent             | present       | abscent |
| 54       | endo                        | abscent                       | present | present | present | NA                  | present            | NA                  | present       | NA      |
| 55       | crescentic                  | present                       | present | abscent | present | NA                  | NA                 | NA                  | NA            | NA      |
| 56       | endo + mesangial            | NA                            | present | NA      | present | NA                  | present            | NA                  | present       | NA      |
| 57       | NA                          | NA                            | NA      | NA      | NA      | NA                  | NA                 | NA                  | NA            | NA      |
| 58       | endo + mesangial            | present                       | NA      | NA      | NA      | NA                  | NA                 | NA                  | NA            | NA      |
| 59       | endo + mesangial            | abscent                       | present | present | present | abscent             | present            | NA                  | present       | abscent |
| 60       | MPGN & Mesangial            | abscent                       | present | present | present | NA                  | NA                 | NA                  | NA            | NA      |
| 61       | MPGN                        | NA                            | NA      | NA      | present | NA                  | NA                 | NA                  | NA            | NA      |
| 62       | endo + mesangial            | present                       | present | present | present | abscent             | present            | NA                  | present       | abscent |
| 63       | crescentic                  | present                       | present | abscent | present | NA                  | NA                 | present             | NA            | NA      |
| 64       | mesangial                   | abscent                       | present | present | present | NA                  | present            | NA                  | present       | NA      |
| 65       | endo                        | present                       | present | present | present | NA                  | NA                 | NA                  | NA            | NA      |
| 66       | endo                        | present                       | NA      | present | abscent | NA                  | NA                 | NA                  | NA            | NA      |
| 67       | mesangial                   | NA                            | present | present | present | NA                  | NA                 | NA                  | present       | NA      |
| 68       | crescentic                  | present                       | abscent | abscent | abscent | NA                  | NA                 | NA                  | NA            | NA      |
| 69       | MPGN                        | NA                            | NA      | NA      | NA      | NA                  | NA                 | NA                  | NA            | NA      |
| 70       | MPGN                        | present                       | abscent | abscent | present | NA                  | present            | NA                  | present       | NA      |
| 71       | mesangial                   | present                       | abscent | abscent | abscent | NA                  | NA                 | NA                  | NA            | NA      |
| 72       | endo + mesangial            | NA                            | present | present | present | NA                  | NA                 | NA                  | NA            | NA      |
| 73       | endo + mesangial            | NA                            | present | present | present | NA                  | present            | NA                  | present       | NA      |
| 74       | DM + cresc                  | present                       | abscent | abscent | abscent | NA                  | NA                 | NA                  | NA            | NA      |
| 75       | endo                        | abscent                       | present | abscent | present | NA                  | NA                 | NA                  | NA            | NA      |

NA, not available; endo, endothelial proliferative glomerulonephritis; mesangial, mesangial proliferative glomerulonephritis; MPGN, membranoproliferative glomerulonephritis; EDD, electron dense deposit

| Ref. No. | treated with steroid | Outcome |      |           |
|----------|----------------------|---------|------|-----------|
|          |                      | death   | ESKD | remission |
| 14       | no                   | death   | HD   | no        |
| 15       | yes                  | alive   | no   | no        |
| 16       | yes                  | death   | no   | no        |
| 17       | yes                  | alive   | no   | yes       |
| 18       | yes                  | alive   | HD   | no        |
| 19       | no                   | alive   | no   | no        |
| 20       | yes                  | alive   | no   | yes       |
|          | yes                  | alive   | no   | yes       |
| 21       | yes                  | alive   | no   | yes       |
| 22       | no                   | alive   | no   | no        |
| 23       | yes                  | alive   | HD   | no        |
| 24       | yes                  | alive   | PD   | no        |
| 25       | yes                  | alive   | no   | yes       |
| 26       | no                   | alive   | no   | yes       |
| 27       | yes                  | alive   | no   | yes       |
| 28       | yes                  | alive   | no   | no        |
| 29       | yes                  | alive   | HD   | no        |
| 30       | yes                  | alive   | HD   | no        |
|          | yes                  | alive   | HD   | no        |
| 31       | no                   | alive   | no   | yes       |
| 32       | no                   | alive   | no   | no        |
| 33       | yes                  | alive   | HD   | no        |
| 34       | yes                  | alive   | HD   | no        |
| 35       | no                   | alive   | no   | yes       |
| 36       | no                   | alive   | HD   | no        |
| 37       | no                   | alive   | no   | yes       |
|          | yes                  | alive   | no   | yes       |
| 38       | no                   | alive   | no   | yes       |
| 39       | no                   | alive   | HD   | no        |
| 40       | no                   | alive   | no   | no        |
| 41       | NA                   | NA      | NA   | NA        |
| 42       | yes                  | alive   | no   | yes       |
| 43       | no                   | death   | HD   | no        |
| 44       | yes                  | alive   | no   | yes       |
| 45       | yes                  | alive   | no   | yes       |
| 46       | no                   | alive   | no   | yes       |
| 47       | no                   | alive   | no   | no        |
| 48       | yes                  | alive   | no   | no        |
| 49       | yes                  | alive   | HD   | no        |
|          | no                   | alive   | no   | no        |
| 50       | yes                  | alive   | no   | no        |
| 51       | no                   | alive   | no   | yes       |
| 52       | no                   | alive   | no   | yes       |
| 53       | yes                  | alive   | no   | no        |
| 54       | no                   | alive   | HD   | no        |
| 55       | no                   | alive   | no   | yes       |
| 56       | no                   | alive   | no   | no        |
| 57       | yes                  | alive   | no   | yes       |
| 58       | no                   | alive   | no   | yes       |
| 59       | no                   | alive   | no   | no        |
| 60       | no                   | alive   | no   | no        |
| 61       | no                   | alive   | no   | yes       |
| 62       | yes                  | alive   | no   | yes       |
| 63       | no                   | alive   | no   | no        |
| 64       | no                   | alive   | no   | yes       |
| 65       | yes                  | alive   | no   | yes       |
| 66       | yes                  | death   | HD   | no        |
| 67       | yes                  | alive   | no   | yes       |
| 68       | no                   | alive   | no   | yes       |
| 69       | no                   | alive   | no   | yes       |
| 70       | no                   | alive   | HD   | no        |
| 71       | yes                  | alive   | HD   | no        |
| 72       | yes                  | death   | HD   | no        |
| 73       | yes                  | alive   | no   | no        |
| 74       | yes                  | death   | no   | no        |
| 75       | no                   | alive   | no   | no        |

NA, not available; ESKD, end-stage kidney disease; HD, hemodialysis
