# Supplementary material for: Staphylococcus aureus Infection-Related Glomerulonephritis with Dominant IgA Deposition
Source: MDPI journal article supplement (doi:10.3390/ijms23137482), 2022-07-05
Supplement: s1 [file s1]

**Table S2.** Cohort studies of IgA-IRGN or SAGN.

| Ref. No. | authors                           | year | category |      | No. of patients | age                     |             | underlying disease |          | Causative bacteria |             |
|----------|-----------------------------------|------|----------|------|-----------------|-------------------------|-------------|--------------------|----------|--------------------|-------------|
|          |                                   |      | IgA-IRGN | SAGN |                 | mean $\pm$ SD (range)   | male gender | diabetes           | Cancer   | Staphylo coccus    | S. aureus   |
| 76       | Ramineni S, et al.                | 2021 | No       | No   | 27              | 42.6 $\pm$ 15.1 (19-58) | 20 (74%)    | 10 (37%)           | NA       | 5 (19%)            | NA          |
| 77       | Ai S, et al.                      | 2021 | No       | No   | 20              | 40.8 $\pm$ 13.0 (19-58) | 16 (80%)    | NA                 | NA       | 0 (0%)             | 0 (0%)      |
| 78       | Grosser DS, et al.                | 2021 | Yes      | No   | 9               | 11.4 $\pm$ 3.3 (6-16)   | 8 (89%)     | 0 (0%)             | 0 (0%)   | 2 (22%)            | 1 (11%)     |
| 79       | Huang Z, et al.                   | 2021 | Yes      | No   | 50              | 42.8 $\pm$ 16.1 (19-80) | 21 (42%)    | 4 (8%)             | 0 (0%)   | 2 (4%)             | 2 (4%)      |
| 80       | Zhang M, et al.                   | 2021 | Yes      | No   | 12              | 58.7 $\pm$ 21.2 (25-90) | 10 (83%)    | 4 (33%)            | NA       | 2 (17%)            | NA          |
| 81       | Miquelestorena-Standley E, et al. | 2020 | Yes      | No   | 27              | 62 $\pm$ 15 (5-83)      | 23 (85%)    | 18 (69%)           | 2 (7%)   | 21 (78%)           | 20 (74%)    |
| 82       | Kitamura M, et al.                | 2019 | Yes      | Yes  | 7               | 58.3 $\pm$ 21.1 (18-79) | 7 (100%)    | 2 (29%)            | NA       | 7 (100%)           | 7 (100%)    |
| 83       | Sakthirajan R, et al.             | 2018 | No       | No   | 47              | 42 $\pm$ 14             | 29 (62%)    | 9 (19%)            | NA       | 11 (23%)           | 11 (23%)    |
| 84       | Handa T, et al.                   | 2018 | Yes      | No   | 13              | 51 $\pm$ 17             | 10 (77%)    | 2 (15%)            | NA       | 5 (38%)            | 5 (38%)     |
| 85       | Khalighi MA, et al.               | 2018 | Yes      | Yes  | 5               | 58.8 $\pm$ 15.5 (33-75) | 3 (60%)     | NA                 | NA       | 5 (100%)           | 5 (100%)    |
| 86       | Hemminger J, et al.               | 2018 | Yes      | No   | 9               | 54.0 $\pm$ 8.3 (43-68)  | 8 (89%)     | 2 (22%)            | 0 (0%)   | 2 (22%)            | 2 (22%)     |
| 87       | Ramanathan G, et al.              | 2017 | No       | No   | 43              | 44 (34-53)              | 22 (51%)    | 26 (61%)           | 0 (0%)   | 9 (21%)            | NA          |
| 88       | Satoskar AA, et al.               | 2017 | No       | Yes  | 78              | 55.0 $\pm$ 12.1 (21-91) | 61 (78%)    | 32 (41%)           | NA       | 78 (100%)          | 59 (76%)    |
| 89       | Dhanapriya J, et al.              | 2017 | Yes      | No   | 12              | 52.4 $\pm$ 13.0 (24-65) | 8 (67%)     | 2 (17%)            | 0 (0%)   | 6 (50%)            | 6 (50%)     |
| 90       | Boils CL, et al.                  | 2015 | No       | No   | 49              | 48 (3-84)               | 38 (78%)    | 9 (18%)            | 1 (2%)   | 25 (51%)           | 23 (47%)    |
| 91       | Murakami CA, et al.               | 2014 | No       | No   | 72              | 48 (41-53)              | 46 (64%)    | 17 (24%)           | NA       | 25 (75%)           | NA          |
| 92       | Hamouda M, et al.                 | 2014 | No       | No   | 50              | 36.8 $\pm$ 10.0 (30-80) | 33 (66%)    | 5 (10%)            | NA       | 6 (12%)            | NA          |
| 93       | Cossey LN, et al.                 | 2014 | Yes      | No   | 19              | NA                      | NA          | 19 (100%)          | NA       | NA                 | NA          |
| 94       | Satoskar AA, et al.               | 2013 | Yes      | Yes  | 8               | 59.8 $\pm$ 15.8 (44-90) | 7 (88%)     | 0 (0%)             | 2 (25%)  | 8 (100%)           | 7 (88%)     |
| 95       | Koo TY, et al.                    | 2012 | Yes      | No   | 7               | 64.7 $\pm$ 21.7 (31-84) | 6 (86%)     | 1 (14%)            | 0 (0%)   | 2 (29%)            | 2 (29%)     |
| 96       | Worawichawong S, et al.           | 2011 | Yes      | No   | 7               | 66.4 $\pm$ 15.5 (46-86) | 5 (71%)     | 1 (14%)            | 0 (0%)   | 4 (57%)            | 4 (57%)     |
| 97       | Wen YK, et al.                    | 2011 | Yes      | No   | 10              | 57 $\pm$ 17 (23-74)     | 9 (90%)     | 1 (10%)            | 1 (10%)  | 3 (30%)            | 3 (30%)     |
|          |                                   |      | No       | No   | 32              | 54 $\pm$ 19             | 20 (63%)    | NA                 | NA       | 10/26 (38%)        | NA          |
|          |                                   |      | No       | No   | 109             | > 65                    | 80 (73%)    | 53 (49%)           | 15 (14%) | 50 (46%)           | 45 (41%)    |
| 98       | Nasr SH, et al.                   | 2011 | No       | No   | 57              | 16-64                   | 33 (58%)    | 13 (23%)           | 1 (2%)   | 8 (14%)            | NA          |
|          |                                   |      | No       | No   | 20              | 60.9 $\pm$ 14.7 (30-80) | 14 (70%)    | NA                 | NA       | 12 (60%)           | 12 (60%)    |
| 100      | Wen YK, et al.                    | 2010 | No       | No   | 21              | 60.4 $\pm$ 14.5 (30-80) | 15 (71%)    | NA                 | NA       | 12 (57%)           | 12 (57%)    |
| 101      | Wen YK, et al.                    | 2010 | Yes      | No   | 12              | 62.3 $\pm$ 16.9 (23-80) | 9 (75%)     | 1 (8%)             | NA       | 7 (58%)            | 6 (50%)     |
| 102      | Hsieh YP, et al.                  | 2010 | No       | No   | 21              | 60.4 $\pm$ 14.5 (30-80) | 15 (71%)    | NA                 | NA       | 12 (57%)           | 12 (57%)    |
| 103      | Wen YK                            | 2009 | No       | No   | 20              | 60.9 $\pm$ 14.7 (30-80) | 14 (70%)    | NA                 | NA       | 12 (60%)           | 12 (60%)    |
| 104      | Haas M, et al.                    | 2008 | Yes      | No   | 13              | 50 $\pm$ 22 (16-85)     | 11 (85%)    | 5 (38%)            | NA       | 6 (46%)            | 6 (46%)     |
| 105      | Zeledon JI, et al.                | 2008 | No       | No   | 4               | 59.5 $\pm$ 8.3 (53-71)  | 4 (100%)    | 0 (0%)             | 1 (25%)  | 2 (50%)            | 2 (50%)     |
| 106      | Nasr SH, et al.                   | 2008 | No       | No   | 86              | 56 $\pm$ 16             | 57 (66%)    | 25 (29%)           | 4 (5%)   | 21 (24%)           | NA          |
| 107      | Satoskar AA, et al.               | 2006 | Yes      | Yes  | 8               | 67.0 $\pm$ 7.8 (56-80)  | 6 (75%)     | 2 (25%)            | 1 (13%)  | 8 (100%)           | 7 (88%)     |
| 108      | Nasr SH, et al.                   | 2003 | Yes      | Yes  | 5               | 64.8 $\pm$ 15.0 (50-89) | 4 (80%)     | 5 (100%)           | NA       | 5 (100%)           | 3 (60%)     |
| 109      | Nakamura T, et al.                | 2003 | Yes      | Yes  | 20              | 63.7 $\pm$ 10.2         | 12 (60%)    | NA                 | NA       | 20 (100%)          | 20 (100%)   |
| 110      | Nagaba Y, et al.                  | 2002 | Yes      | Yes  | 8               | 53.0 $\pm$ 18.4 (23-75) | 7 (88%)     | NA                 | NA       | 8 (100%)           | 8 (100%)    |
| 111      | Majumdar A, et al.                | 2000 | No       | No   | 62              | 57 (15-85)              | 39 (63%)    | NA                 | NA       | 21/50 (42%)        | 17/50 (34%) |
| 111      | Majumdar A, et al.                | 2000 | No       | No   | 20              | 58.1 $\pm$ 10.1         | 14 (70%)    | NA                 | NA       | 8 (40%)            | 6 (30%)     |
| 9-13     | our data                          |      | Yes      | Yes  | 28              | 61.3 $\pm$ 15.1         | 25 (89%)    | NA                 | NA       | 28 (100%)          | 28 (100%)   |

IgA-IRGN, IgA-dominant deposition infection-related glomerulonephritis; SAGN, Staphylococcus infection-associated glomerulonephritis; NA, not available.

| Ref. No. | Causative bacteria |                       |                |               |                        |                | Infection sites |              |             |                  |             |             |
|----------|--------------------|-----------------------|----------------|---------------|------------------------|----------------|-----------------|--------------|-------------|------------------|-------------|-------------|
|          | S. epidermidis     | other Staphylo coccus | Strepto coccus | others        | unknown / not detected | skin infection | bone or joint   | endocarditis | respiratory | visceral abscess | others      | unknown     |
| 76       | NA                 | NA                    | 5<br>(19%)     | 5<br>(19%)    | 12<br>(44%)            | 5<br>(19%)     | 0<br>(0%)       | 0<br>(0%)    | 9<br>(33%)  | 0<br>(0%)        | 3<br>(11%)  | 10<br>(37%) |
| 77       | 0<br>(0%)          | 0<br>(0%)             | 10<br>(50%)    | 4<br>(20%)    | 6<br>(30%)             | 0<br>(0%)      | 0<br>(0%)       | 20<br>(100%) | 0<br>(0%)   | 0<br>(0%)        | 0<br>(0%)   | 0<br>(0%)   |
| 78       | 0<br>(0%)          | 1<br>(11%)            | 5<br>(56%)     | 1<br>(11%)    | 1<br>(11%)             | 0<br>(0%)      | 0<br>(0%)       | 0<br>(0%)    | 2<br>(22%)  | 0<br>(0%)        | 2<br>(22%)  | 5<br>(56%)  |
| 79       | 0<br>(0%)          | 0<br>(0%)             | 1<br>(2%)      | 7<br>(14%)    | 40<br>(80%)            | 4<br>(8%)      | 0<br>(0%)       | 0<br>(0%)    | 13<br>(26%) | 0<br>(0%)        | 14<br>(28%) | 19<br>(38%) |
| 80       | NA                 | NA                    | 1<br>(8%)      | 1<br>(8%)     | 8<br>(67%)             | 3<br>(25%)     | 0<br>(0%)       | 1<br>(8%)    | 4<br>(33%)  | 0<br>(0%)        | 2<br>(17%)  | 2<br>(17%)  |
| 81       | 0<br>(0%)          | 1<br>(4%)             | 1<br>(4%)      | 8<br>(30%)    | 3<br>(11%)             | 11<br>(41%)    | 12<br>(44%)     | 4<br>(15%)   | 4<br>(15%)  | 0<br>(0%)        | 8<br>(30%)  | 3<br>(11%)  |
| 82       | NA                 | NA                    | NA             | NA            | NA                     | NA             | NA              | NA           | NA          | NA               | NA          | NA          |
| 83       | 0<br>(0%)          | 0<br>(0%)             | 3<br>(6%)      | 11<br>(23%)   | 22<br>(47%)            | 18<br>(38%)    | 1<br>(2%)       | 0<br>(0%)    | 3<br>(6%)   | 0<br>(0%)        | 9<br>(19%)  | 16<br>(34%) |
| 84       | 0<br>(0%)          | 0<br>(0%)             | 3<br>(23%)     | 0<br>(0%)     | 5<br>(38%)             | 5<br>(38%)     | 0<br>(0%)       | 2<br>(23%)   | 5<br>(38%)  | 0<br>(0%)        | 0<br>(0%)   | 1<br>(8%)   |
| 85       | 0<br>(0%)          | 0<br>(0%)             | 0<br>(0%)      | 0<br>(0%)     | 0<br>(0%)              | 3<br>(60%)     | 2<br>(40%)      | 0<br>(0%)    | 0<br>(0%)   | 0<br>(0%)        | 0<br>(0%)   | 0<br>(0%)   |
| 86       | 0<br>(0%)          | 0<br>(0%)             | 0<br>(0%)      | 3<br>(33%)    | 4<br>(44%)             | 3<br>(33%)     | 0<br>(0%)       | 0<br>(0%)    | 1<br>(11%)  | 0<br>(0%)        | 2<br>(22%)  | 3<br>(33%)  |
| 87       | NA                 | NA                    | 9<br>(21%)     | 6<br>(14%)    | 19<br>(44%)            | 20<br>(47%)    | 0<br>(0%)       | 0<br>(0%)    | 16<br>(37%) | 0<br>(0%)        | 6<br>(14%)  | 1<br>(2%)   |
| 88       | 5<br>(6%)          | 7<br>(9%)             | 0<br>(0%)      | 7<br>(9%)     | 0<br>(0%)              | 17<br>(22%)    | 17<br>(22%)     | 18<br>(23%)  | 6<br>(8%)   | 6<br>(8%)        | 14<br>(18%) | 0<br>(0%)   |
| 89       | 0<br>(0%)          | 0<br>(0%)             | 0<br>(0%)      | 4<br>(33%)    | 2<br>(17%)             | 6<br>(50%)     | 0<br>(0%)       | 0<br>(0%)    | 0<br>(0%)   | 0<br>(0%)        | 4<br>(33%)  | 2<br>(17%)  |
| 90       | 0<br>(0%)          | 2<br>(4%)             | 11<br>(22%)    | 8<br>(16%)    | 0<br>(0%)              | 0<br>(0%)      | 0<br>(0%)       | 49<br>(100%) | 0<br>(0%)   | 0<br>(0%)        | 0<br>(0%)   | 0<br>(0%)   |
| 91       | NA                 | NA                    | 15<br>(21%)    | 11<br>(15%)   | 21<br>(29%)            | 8<br>(11%)     | 3<br>(4%)       | 16<br>(22%)  | 11<br>(15%) | 0<br>(0%)        | 3<br>(4%)   | 30<br>(42%) |
| 92       | NA                 | NA                    | 33<br>(66%)    | NA            | NA                     | 17<br>(34%)    | 0<br>(0%)       | 0<br>(0%)    | 30<br>(60%) | 0<br>(0%)        | 0<br>(0%)   | 5<br>(10%)  |
| 93       | NA                 | NA                    | NA             | NA            | NA                     | NA             | NA              | NA           | NA          | NA               | NA          | NA          |
| 94       | 1<br>(13%)         | 0<br>(0%)             | 0<br>(0%)      | 0<br>(0%)     | 0<br>(0%)              | 4<br>(50%)     | 1<br>(13%)      | 1<br>(13%)   | 0<br>(0%)   | 2<br>(25%)       | 0<br>(0%)   | 0<br>(0%)   |
| 95       | 0<br>(0%)          | 0<br>(0%)             | 0<br>(0%)      | 1<br>(14%)    | 4<br>(57%)             | NA             | NA              | NA           | NA          | NA               | NA          | NA          |
| 96       | 0<br>(0%)          | 3<br>(43%)            | 0<br>(0%)      | 0<br>(0%)     | 0<br>(0%)              | 3<br>(43%)     | 0<br>(0%)       | 1<br>(14%)   | 2<br>(29%)  | 0<br>(0%)        | 1<br>(14%)  | 0<br>(0%)   |
| 97       | 0<br>(0%)          | 0<br>(0%)             | 2<br>(20%)     | 5<br>(50%)    | 0<br>(0%)              | 1<br>(10%)     | 4<br>(40%)      | 0<br>(0%)    | 2<br>(20%)  | 1<br>(10%)       | 2<br>(20%)  | 0<br>(0%)   |
|          | NA                 | NA                    | NA             | NA            | NA                     | NA             | NA              | NA           | NA          | NA               | NA          | NA          |
| 98       | 2<br>(2%)          | 3<br>(3%)             | 17<br>(16%)    | 13<br>(12%)   | 37<br>(34%)            | 31<br>(28%)    | 8<br>(7%)       | 7<br>(6%)    | 30<br>(28%) | 5<br>(5%)        | 20<br>(18%) | 19<br>(17%) |
|          | NA                 | NA                    | 19<br>(33%)    | NA            | NA                     | 6<br>(11%)     | NA              | NA           | 27<br>(48%) | NA               | NA          | NA          |
| 99       | 0<br>(0%)          | 0<br>(0%)             | 3<br>(15%)     | 4<br>(20%)    | 1<br>(5%)              | 2<br>(10%)     | 3<br>(15%)      | 4<br>(20%)   | 3<br>(15%)  | 2<br>(10%)       | 5<br>(40%)  | 1<br>(5%)   |
| 100      | NA                 | NA                    | NA             | NA            | NA                     | 5<br>(24%)     | 3<br>(14%)      | 4<br>(19%)   | 4<br>(19%)  | 2<br>(10%)       | 3<br>(14%)  | 0<br>(0%)   |
| 101      | 1<br>(8%)          | 0<br>(0%)             | 2<br>(17%)     | 3<br>(25%)    | 0<br>(0%)              | NA             | NA              | NA           | NA          | NA               | NA          | NA          |
| 102      | NA                 | NA                    | NA             | NA            | NA                     | 5<br>(24%)     | 3<br>(14%)      | 4<br>(19%)   | 4<br>(19%)  | 2<br>(10%)       | 3<br>(14%)  | 0<br>(0%)   |
| 103      | 0<br>(0%)          | 0<br>(0%)             | 3<br>(15%)     | 4<br>(20%)    | 1<br>(5%)              | 2<br>(10%)     | 3<br>(15%)      | 4<br>(20%)   | 3<br>(15%)  | 2<br>(10%)       | 5<br>(40%)  | 1<br>(5%)   |
| 104      | 0<br>(0%)          | 0<br>(0%)             | 0<br>(0%)      | 3<br>(23%)    | 4<br>(31%)             | 3<br>(23%)     | 0<br>(0%)       | 0<br>(0%)    | 1<br>(8%)   | 1<br>(8%)        | 4<br>(31%)  | 4<br>(31%)  |
| 105      | 0<br>(0%)          | 0<br>(0%)             | 2<br>(50%)     | 0<br>(0%)     | 0<br>(0%)              | 0<br>(0%)      | 1<br>(25%)      | 2<br>(50%)   | 0<br>(0%)   | 0<br>(0%)        | 1<br>(25%)  | 0<br>(0%)   |
| 106      | NA                 | NA                    | 24<br>(28%)    | 5<br>(6%)     | 36<br>(42%)            | 16<br>(19%)    | 4<br>(5%)       | 10<br>(12%)  | 35<br>(41%) | 2<br>(2%)        | 5<br>(6%)   | 14<br>(16%) |
| 107      | 1<br>(13%)         | 0<br>(0%)             | 0<br>(0%)      | 0<br>(0%)     | 0<br>(0%)              | 4<br>(50%)     | 0<br>(0%)       | 1<br>(13%)   | 0<br>(0%)   | 1<br>(13%)       | 2<br>(25%)  | 0<br>(0%)   |
| 108      | 2<br>(40%)         | 0<br>(0%)             | 1<br>(20%)     | 0<br>(0%)     | 0<br>(0%)              | 4<br>(80%)     | 1<br>(20%)      | 0<br>(0%)    | 0<br>(0%)   | 1<br>(20%)       | 0<br>(0%)   | 0<br>(0%)   |
| 109      | 0<br>(0%)          | 0<br>(0%)             | 0<br>(0%)      | 0<br>(0%)     | 0<br>(0%)              | NA             | NA              | NA           | NA          | NA               | NA          | NA          |
| 110      | 0<br>(0%)          | 0<br>(0%)             | 0<br>(0%)      | 0<br>(0%)     | 0<br>(0%)              | 3<br>(38%)     | 0<br>(0%)       | 0<br>(0%)    | 2<br>(25%)  | 1<br>(13%)       | 2<br>(25%)  | 0<br>(0%)   |
| 111      | 4/50<br>(8%)       | 0<br>(0%)             | 17/50<br>(34%) | 6/50<br>(12%) | 6/50<br>(12%)          | 0<br>(0%)      | 0<br>(0%)       | 62<br>(100%) | 0<br>(0%)   | 0<br>(0%)        | 0<br>(0%)   | 0<br>(0%)   |
| 111      | 2<br>(10%)         | 0<br>(0%)             | 3<br>(15%)     | 2<br>(10%)    | 7<br>(35%)             | 0<br>(0%)      | 0<br>(0%)       | 20<br>(100%) | 0<br>(0%)   | 0<br>(0%)        | 0<br>(0%)   | 0<br>(0%)   |
| 9-13     | 0<br>(0%)          | 0<br>(0%)             | 0<br>(0%)      | 0<br>(0%)     | 0<br>(0%)              | 3<br>(11%)     | 1<br>(4%)       | 0<br>(0%)    | 8<br>(29%)  | 14<br>(50%)      | 2<br>(7%)   | 0<br>(0%)   |

| Ref. No. | symptomes   |                    |              |              |           |                        | laboratory data          |                           |                     |                     |                        |
|----------|-------------|--------------------|--------------|--------------|-----------|------------------------|--------------------------|---------------------------|---------------------|---------------------|------------------------|
|          | AKI or RPGN | nephrotic syndrome | proteinuria  | hematuria    | purpura   | proteinuria (g/day)    | serum creatinine (mg/dL) | elevated serum IgA levels | decreased C3 levels | decreased C4 levels | positive test for ANCA |
| 76       | 26 (96%)    | 1 (4%)             | NA           | NA           | NA        | 4.1 ± 1.4              | 5.7 ± 2.47               | NA                        | 24 (89%)            | NA                  | NA                     |
| 77       | 12 (60%)    | NA                 | 19 (95%)     | 20 (100%)    | 20 (100%) | 2.64 ± 2.08 (0.0-5.8)  | 5.95 ± 2.99 (1.3-11.3)   | NA                        | 13/17 (76%)         |                     | 7/17 (41%)             |
| 78       | 7 (78%)     | 4 (44%)            | 9 (100%)     | 9 (100%)     | NA        | NA                     | 1.92 ± 0.93 (0.8-3.4)    | NA                        | NA                  | NA                  | NA                     |
| 79       | NA          | NA                 | NA           | NA           | NA        | 3.24 ± 3.41            | 1.39 ± 1.07              | NA                        | NA                  | NA                  | NA                     |
| 80       | 10 (83%)    | 7 (58%)            | 12 (100%)    | 12 (100%)    | 2 (17%)   | 5.14 ± 3.05 (0.7-10.3) | 3.28 ± 2.11 (0.9-8.3)    | NA                        | 8 (67%)             |                     | 0/11 (0%)              |
| 81       | 15 (57%)    | 18 (67%)           | NA           | 20/21 (95%)  | NA        | 5.0 ± 3.4 (0.4-16.4)   | 4.24 ± 2.93              | 11/13 (85%)               | 4/25 (16%)          | 2/26 (8%)           | 4/15 (27%)             |
| 82       | NA          | NA                 | 6 (86%)      | 7 (100%)     | NA        | 4.78 ± 3.75 (0.1-10.1) | 2.45 ± 1.59 (0.5-4.8)    | NA                        | 0/6 (0%)            | 0/6 (0%)            | NA                     |
| 83       | 37 (79%)    | 26 (55%)           | 47 (100%)    | 40 (85%)     | NA        | NA                     | NA                       | NA                        | 47 (100%)           | 4 (9%)              | NA                     |
| 84       | NA          | NA                 | NA           | 11 (85%)     | NA        | 5.3 ± 6.4 (0.01-19.06) | 1.49 ± 0.80 (0.57-3.19)  | NA                        | 4 (31%)             | 3 (23%)             | NA                     |
| 85       | 5 (100%)    | NA                 | 4/4 (100%)   | 4/4 (100%)   | NA        | NA                     | 3.94 ± 1.54 (1.7-6.0)    | 5 (100%)                  | 4/4 (100%)          | 0 (0%)              | NA                     |
| 86       | 9 (100%)    | NA                 | 9 (100%)     | 9 (100%)     | 1 (11%)   | 13.2 ± 13.2 (0.4-38)   | 4.82 ± 1.60 (2.7-7.7)    | NA                        |                     | 5/8 (63%)           | 0 (0%)                 |
| 87       | NA          | 4 (9%)             | NA           | 34 (79%)     | NA        | 2.33 (1.31-4.79)       | 0.97 (0.81-1.27)         | NA                        | 38 (88%)            | 14 (33%)            | 8 (19%)                |
| 88       | NA          | 35/73 (48%)        | 73/73 (100%) | NA           | 16 (21%)  | NA                     | NA                       | NA                        | 19/64 (30%)         | 9/64 (14%)          | 9/41 (22%)             |
| 89       | 11 (92%)    | 11 (92%)           | 12 (100%)    | 12 (100%)    | NA        | 5.23 ± 1.85 (1.8-8.5)  | 5.65 ± 2.44 (1.5-8.7)    | NA                        | 1 (8%)              | 0 (0%)              | NA                     |
| 90       | 40/47 (85%) | 3/47 (6%)          | NA           | 36/37 (97%)  | NA        | 1.8 (0.5-15)           | 3.8 (1.0-12.0)           | NA                        | 17/32 (53%)         | 6/32 (19%)          | 8/29 (28%)             |
| 91       | NA          | 19 (26%)           | NA           | 31 (43%)     | NA        | NA                     | 2.5 (1.5-4.9)            | NA                        | 12 (17%)            | 12 (17%)            | NA                     |
| 92       | NA          | 5 (10%)            | NA           | NA           | NA        | NA                     | 2.14                     | NA                        | 31/42 (74%)         | 8/42 (19%)          | 0/2 (0%)               |
| 93       | 16 (84%)    | 5 (26%)            | NA           | NA           | NA        | NA                     | NA                       | NA                        | NA                  | NA                  | NA                     |
| 94       | 8 (100%)    | NA                 | 7 (88%)      | 8 (100%)     | 8 (100%)  | NA (0-10)              | 3.83 ± 2.59 (1.9-9.7)    | NA                        | 2/7 (29%)           | 0/7 (0%)            | NA                     |
| 95       | 7 (100%)    | NA                 | 7 (100%)     | 7 (100%)     | NA        | 5.34 ± 1.87 (3.2-8.9)  | 3.13 ± 1.02 (1.9-4.7)    | 5 (71%)                   | 2 (29%)             | 2 (29%)             | NA                     |
| 96       | 6 (86%)     | 2 (29%)            | 7 (100%)     | 7 (100%)     | NA        | NA                     | 8.09 ± 2.71              | NA                        | 1 (14%)             | 1 (14%)             | NA                     |
| 97       | 9 (90%)     | 6 (60%)            | 10 (100%)    | 10 (100%)    | NA        | 3.9 ± 3.6 (0.1-9.8)    | 5.1 ± 3.8 (1.2-11.8)     | 6/8 (75%)                 | 6 (60%)             |                     | NA                     |
|          | NA          | NA                 | NA           | NA           | NA        | 2.9 ± 2.9              | 6.5 ± 5.6                | 4/22 (18.2%)              | 24 (75%)            |                     | NA                     |
| 98       | NA          | 23/87 (26%)        | 72/72 (100%) | 98/103 (95%) | NA        | 3.6                    | 5.1                      | NA                        | 57/83 (69%)         | 29/83 (35%)         | 5/66 (8%)              |
|          | NA          | NA                 | NA           | NA           | NA        | 3.8                    | 3.8                      | NA                        | NA                  | NA                  | NA                     |
| 99       | 18 (90%)    | 8 (40%)            | 20 (100%)    | 20 (100%)    | NA        | 3.2 ± 2.6 (0.5-9.8)    | 6.7 ± 3.3 (1.7-11.8)     | NA                        | 12 (60%)            | NA                  | NA                     |
| 100      | 21 (100%)   | NA                 | NA           | 21 (100%)    | NA        | 3.2 (0.5-9.8)          | 6.5 ± 3.3 (1.7-11.8)     | NA                        | 13 (62%)            | NA                  | NA                     |
| 101      | 10 (83%)    | NA                 | NA           | 12 (100%)    | NA        | 3.9 ± 3.2 (0.4-9.8)    | 5.0 ± 3.5 (0.6-11.8)     | 6/9 (67%)                 | 7 (58%)             |                     | NA                     |
| 102      | 21 (100%)   | NA                 | NA           | 21 (100%)    | NA        | 3.2 (0.5-9.8)          | 6.5 ± 3.3 (1.7-11.8)     | NA                        | 13 (62%)            | NA                  | NA                     |
| 103      | 18 (90%)    | 8 (40%)            | 20 (100%)    | 20 (100%)    | NA        | 3.2 ± 2.6 (0.5-9.8)    | 6.7 ± 3.3 (1.7-11.8)     | NA                        | 12 (60%)            | NA                  | NA                     |
| 104      | NA          | 6/10 (60%)         | 10/10 (100%) | 13 (100%)    | NA        | 4.8 ± 3.0 (1.6-11.0)   | 4.4 ± 2.7 (1.4-9.5)      | NA                        | 4/10 (40%)          | NA                  | NA                     |
| 105      | 4 (100%)    | 3 (75%)            | 4 (100%)     | 4 (100%)     | NA        | 4.6 ± 3.7 (0.7-9.6)    | 8.0 ± 4.2 (2.7-11.8)     | NA                        | 3 (75%)             | 1 (25%)             | 1 (25%)                |
| 106      | NA          | 25 (29%)           | NA           | 77 (90%)     | NA        | 3.7                    | 4.36                     | NA                        | 37/58 (64%)         | 28/58 (48%)         | NA                     |
| 107      | NA          | NA                 | 8 (100%)     | 8 (100)      | NA        | 6.4 ± 3.4 (2.5-9.0)    | 4.6 ± 2.4 (1.3-9.5)      | NA                        | 2 (25%)             | 1 (13%)             | NA                     |
| 108      | 5 (100%)    | NA                 | 3/3 (100%)   | 5 (100%)     | NA        | 1.6 ± 1.2 (0.2-2.5)    | 8.0 ± 3.0 (4.1-10.4)     | 1/1 (100%)                | 5 (100%)            | 2 (40%)             | NA                     |
| 109      | NA          | NA                 | NA           | NA           | NA        | 2.6 ± 0.6              | 2.3 ± 1.2                | NA                        | NA                  | NA                  | NA                     |
| 110      | 5 (63%)     | NA                 | 8 (100)      | 8 (100)      | 7 (88%)   | 3.8 ± 2.7              | 3.6 ± 2.9                | 6 (75%)                   | 2 (25%)             | 0 (0%)              | 0/2 (0%)               |
| 111      | NA          | NA                 | NA           | NA           | NA        | NA                     | NA                       | NA                        | NA                  | NA                  | NA                     |
| 111      | NA          | NA                 | NA           | NA           | NA        | NA                     | 5.88± 3.03 (1.9-12.2)    | NA                        | NA                  | NA                  | NA                     |
| 9-13     | 14          | 18                 | 28           | 20           | 6         | 5.7 ± 4.6              | 2.9 ± 2.4                | 24 (86%)                  | 1 (4%)              | 0 (0%)              | 0 (0%)                 |

| Ref. No. | Light microscopy |                  |              |                          |                       | Immunofluorescence microscopy |                 |                 |                | Electron microscopy |                |                 |                |
|----------|------------------|------------------|--------------|--------------------------|-----------------------|-------------------------------|-----------------|-----------------|----------------|---------------------|----------------|-----------------|----------------|
|          | mesangial GN     | endocapillary GN | MPGN         | necrotizing / crescentic | presence of crescents | IgG                           | IgA             | C3              | subepi. EDD    | subendo. EDD        | intramemb. EDD | mesangial EDD   | hump           |
| 76       | 1<br>(4%)        | 24<br>(4%)       | 1<br>(89%)   | 5<br>(19%)               | 19<br>(70%)           | 19<br>(70%)                   | 1<br>(4%)       | 27<br>(100%)    | NA             | NA                  | NA             | NA              | NA             |
| 77       | 5/5<br>(100%)    | 2/5<br>(40%)     | 0<br>(0%)    | 1/5<br>(20%)             | 4/5<br>(80%)          | 2/5<br>(40%)                  | 3/5<br>(60%)    | 4/5<br>(80%)    | 0/2<br>(0%)    | 1/2<br>(50%)        | 0/2<br>(0%)    | 1/2<br>(50%)    | 0/2<br>(0%)    |
| 78       | 9<br>(100%)      | 8<br>(89%)       | 0<br>(0%)    | 0<br>(0%)                | 5<br>(56%)            | 7<br>(78%)                    | 9<br>(100%)     | 9<br>(100%)     | 6<br>(67%)     | 8<br>(89%)          | 1<br>(11%)     | 9<br>(100%)     | 4<br>(44%)     |
| 79       | 47<br>(94%)      | 40<br>(80%)      | 3<br>(6%)    | 1<br>(2%)                | 38<br>(76%)           | 14<br>(28%)                   | 50<br>(100%)    | 50<br>(100%)    | 3/14<br>(21%)  | 1/14<br>(7%)        | 0<br>(0%)      | 10/14<br>(71%)  | 1/14<br>(7%)   |
| 80       | 2<br>(17%)       | 10<br>(83%)      | 0<br>(0%)    | 0<br>(0%)                | 9<br>(75%)            | 5<br>(42%)                    | 12<br>(100%)    | 12<br>(100%)    | 5/10<br>(50%)  | 6/10<br>(60%)       | NA             | 10/10<br>(100%) | 5/10<br>(50%)  |
| 81       | 24<br>(89%)      | 24<br>(89%)      | 9<br>(33%)   | NA                       | 10<br>(37%)           | 4<br>(15%)                    | 27<br>(100%)    | 27<br>(100%)    | 13<br>(48%)    | NA                  | 3<br>(11%)     | NA              | 13<br>(48%)    |
| 82       | 3<br>(43%)       | 5<br>(71%)       | 0<br>(0%)    | 1<br>(13%)               | 4<br>(57%)            | NA                            | 7<br>(100%)     | 6<br>(86%)      | 3/6<br>(50%)   | 3/6<br>(50%)        | NA             | 6/6<br>(100%)   | NA             |
| 83       | NA               | NA               | NA           | 47<br>(100%)             | 47<br>(100%)          | 33<br>(70%)                   | 7<br>(15%)      | 33<br>(70%)     | NA             | NA                  | NA             | NA              | NA             |
| 84       | 10<br>(77%)      | 11<br>(85%)      | NA           | NA                       | NA                    | 4<br>(31%)                    | 13<br>(100%)    | 11<br>(85%)     | 4<br>(31%)     | 5<br>(38%)          | 1<br>(8%)      | 6<br>(46%)      | 3<br>(23%)     |
| 85       | 5<br>(100%)      | 5<br>(100%)      | 1<br>(20%)   | 0<br>(0%)                | 4<br>(80%)            | 3<br>(60%)                    | 5<br>(100%)     | 5<br>(100%)     | 2<br>(40%)     | 5<br>(100%)         | 2<br>(40%)     | 5<br>(100%)     | 1<br>(20%)     |
| 86       | 9<br>(100%)      | 8<br>(89%)       | 0<br>(0%)    | 0<br>(0%)                | 3<br>(33%)            | 9<br>(100%)                   | 9<br>(100%)     | 9<br>(100%)     | 5<br>(56%)     | 9<br>(100%)         | 7<br>(78%)     | 9<br>(100%)     | 1<br>(11%)     |
| 87       | 2<br>(5%)        | 35<br>(81%)      | 2<br>(5%)    | 4<br>(9%)                | 27<br>(63%)           | 17/35<br>(48%)                | 10/35<br>(29%)  | 34/35<br>(97%)  | 31/38<br>(82%) | 9/36<br>(25%)       | NA             | 25/35<br>(71%)  | 31/38<br>(82%) |
| 88       | common           | 47<br>(60%)      | NA           | NA                       | 27<br>(35%)           | 32<br>(41%)                   | 58<br>(74%)     | 67<br>(86%)     | 24<br>(31%)    | NA                  | NA             | frequent        | 24<br>(31%)    |
| 89       | 2<br>(17%)       | 3<br>(25%)       | 0            | 7<br>(58%)               | 8<br>(67%)            | 1<br>(8%)                     | 12<br>(100%)    | 12<br>(100%)    | 4/4<br>(100%)  | 0<br>(0%)           | 0<br>(0%)      | 0<br>(0%)       | 0<br>(0%)      |
| 90       | 5<br>(10%)       | 18<br>(37%)      | 0<br>(0%)    | 26<br>(53%)              | 33<br>(67%)           | 13<br>(27%)                   | 14<br>(29%)     | 46<br>(94%)     | 17<br>(35%)    | 22<br>(45%)         | 0<br>(0%)      | 41<br>(84%)     | 7<br>(14%)     |
| 91       | NA               | NA               | NA           | NA                       | 3<br>(4%)             | 15<br>(21%)                   | 3<br>(4%)       | 45<br>(63%)     | 48<br>(67%)    | 26<br>(36%)         | 0<br>(0%)      | 49<br>(68%)     | 48<br>(67%)    |
| 92       | 2/16<br>(13%)    | 12/16<br>(75%)   | NA           | 2/16<br>(13%)            | 2/16<br>(13%)         | NA                            | NA              | NA              | NA             | NA                  | NA             | NA              | NA             |
| 93       | NA               | NA               | NA           | NA                       | NA                    | 2<br>(11%)                    | 19<br>(100%)    | 15<br>(79%)     | NA             | NA                  | NA             | NA              | NA             |
| 94       | 7<br>(88%)       | 7<br>(88%)       | 0<br>(0%)    | 0<br>(0%)                | 3<br>(38%)            | 8<br>(100%)                   | 8<br>(100%)     | 8<br>(100%)     | 5<br>(63%)     | 2<br>(25%)          | 0<br>(0%)      | 7<br>(88%)      | 2<br>(25%)     |
| 95       | 7<br>(100%)      | 7<br>(100%)      | 0<br>(0%)    | 1<br>(14%)               | 5<br>(71%)            | 6<br>(86%)                    | 7<br>(100%)     | 7<br>(100%)     | 5/6<br>(83%)   | 1/6<br>(17%)        | 4/6<br>(67%)   | 6/6<br>(100%)   | 5/6<br>(83%)   |
| 96       | 7<br>(100%)      | 7<br>(100%)      | 1<br>(14%)   | 1<br>(14%)               | 1<br>(14%)            | 5<br>(71%)                    | 7<br>(100%)     | 7<br>(100%)     | 7<br>(100%)    | 5<br>(71%)          | 3<br>(43%)     | 7<br>(100%)     | 7<br>(100%)    |
| 97       | 0<br>(0%)        | 10<br>(100%)     | 0<br>(0%)    | 3<br>(30%)               | 3<br>(30%)            | 8<br>(80%)                    | 10<br>(100%)    | 10<br>(100%)    | 10<br>(100%)   | 3<br>(30%)          | 0<br>(0%)      | 9<br>(90%)      | 10<br>(100%)   |
|          | NA               | NA               | NA           | NA                       | NA                    | NA                            | NA              | NA              | NA             | NA                  | NA             | NA              | NA             |
| 98       | 14<br>(13%)      | 88<br>(81%)      | 1<br>(1%)    | 5<br>(5%)                | 40<br>(37%)           | 39/97<br>(40%)                | 38/97<br>(39%)  | 97/97<br>(100%) | 100<br>(92%)   | 72<br>(66%)         | 0<br>(0%)      | 95<br>(87%)     | 100<br>(92%)   |
|          | NA               | NA               | NA           | NA                       | NA                    | NA                            | NA              | NA              | NA             | NA                  | NA             | NA              | NA             |
| 99       | 7<br>(35%)       | 13<br>(65%)      | 0<br>(0%)    | 4<br>(20%)               | 9<br>(45%)            | 14<br>(70%)                   | 15<br>(75%)     | 20<br>(100%)    | 13<br>(65%)    | 5<br>(25%)          | 0<br>(0%)      | 12<br>(60%)     | 13<br>(65%)    |
| 100      | 8<br>(38%)       | 13<br>(62%)      | 0<br>(0%)    | 4<br>(19%)               | 9<br>(43%)            | 14<br>(67%)                   | 9<br>(43%)      | 21<br>(100%)    | 9/12<br>(75%)  | 5/12<br>(42%)       | 0/12<br>(0%)   | 11/12<br>(92%)  | 9/12<br>(75%)  |
| 101      | 10<br>(83%)      | 4<br>(33%)       | 0            | NA                       | 4<br>(33%)            | NA                            | 12<br>(100%)    | 12<br>(100%)    | 5<br>(42%)     | NA                  | NA             | NA              | 4<br>(33%)     |
| 102      | 8<br>(38%)       | 13<br>(62%)      | 0<br>(0%)    | 4<br>(19%)               | 9<br>(43%)            | 14<br>(67%)                   | 9<br>(43%)      | 21<br>(100%)    | 9/12<br>(75%)  | 5/12<br>(42%)       | 0/12<br>(0%)   | 11/12<br>(92%)  | 9/12<br>(75%)  |
| 103      | 7<br>(35%)       | 13<br>(65%)      | 0<br>(0%)    | 4<br>(20%)               | 9<br>(45%)            | 14<br>(70%)                   | 15<br>(75%)     | 20<br>(100%)    | 13<br>(65%)    | 5<br>(25%)          | 0<br>(0%)      | 12<br>(60%)     | 13<br>(65%)    |
| 104      | 13<br>(100%)     | 6<br>(46%)       | 0<br>(0%)    | 0<br>(0%)                | 4<br>(31%)            | 5<br>(38%)                    | 13<br>(100%)    | 13<br>(100%)    | 13<br>(65%)    | 6<br>(46%)          | 10<br>(77%)    | 13<br>(65%)     | 13<br>(65%)    |
| 105      | 2<br>(50%)       | 3<br>(75%)       | 0<br>(0%)    | 1<br>(25%)               | 2<br>(50%)            | 2<br>(50%)                    | 2<br>(50%)      | 3<br>(75%)      | 2<br>(50%)     | 0<br>(0%)           | 0<br>(0%)      | 2<br>(50%)      | 2<br>(50%)     |
| 106      | 7<br>(8%)        | 73<br>(85%)      | 2<br>(2%)    | 4<br>(5%)                | 39<br>(45%)           | 55/84<br>(66%)                | 37/84<br>(44%)  | 84/84<br>(100%) | 78/83<br>(94%) | 62/83<br>(75%)      | 0<br>(0%)      | 75/83<br>(90%)  | 75/83<br>(90%) |
| 107      | 6<br>(75%)       | 4<br>(50%)       | 0<br>(0%)    | 0<br>(0%)                | 0<br>(0%)             | 3<br>(38%)                    | 8<br>(100%)     | 7<br>(88%)      | 6<br>(75%)     | 1<br>(13%)          | 0<br>(0%)      | 8<br>(100%)     | 0<br>(0%)      |
| 108      | 5<br>(100%)      | 5<br>(100%)      | 0<br>(0%)    | 0<br>(0%)                | 0<br>(0%)             | 4<br>(80%)                    | 5<br>(100%)     | 5<br>(100%)     | 5<br>(100%)    | 4<br>(80%)          | 0<br>(0%)      | 5<br>(100%)     | 5<br>(100%)    |
| 109      | NA               | NA               | NA           | NA                       | NA                    | NA                            | NA              | NA              | NA             | NA                  | NA             | NA              | NA             |
| 110      | 4<br>(50%)       | 0<br>(0%)        | 0<br>(0%)    | 4<br>(50%)               | 7<br>(88%)            | 1<br>(13%)                    | 8<br>(100%)     | 8<br>(100%)     | 1<br>(13%)     | 1<br>(13%)          | 0<br>(0%)      | 8<br>(100%)     | 0<br>(0%)      |
| 111      | NA               | NA               | NA           | NA                       | NA                    | NA                            | NA              | NA              | NA             | NA                  | NA             | NA              | NA             |
| 111      | 2<br>(10%)       | NA               | 3<br>(15%)   | NA                       | 6<br>(30%)            | NA                            | NA              | NA              | NA             | NA                  | NA             | NA              | NA             |
| 9-13     | 12/17<br>(71%)   | 5/17<br>(29%)    | 1/17<br>(6%) | 2/17<br>(12%)            | 13/17<br>(76%)        | 14/17<br>(82%)                | 17/17<br>(100%) | 17/17<br>(100%) | 5/17<br>(29%)  | 7/17<br>(41%)       | 0/17<br>(0%)   | 8/17<br>(47%)   | 5/17<br>(29%)  |
